# Supplementary material
Source: PubMed Central journal article supplement (PMC2154427)

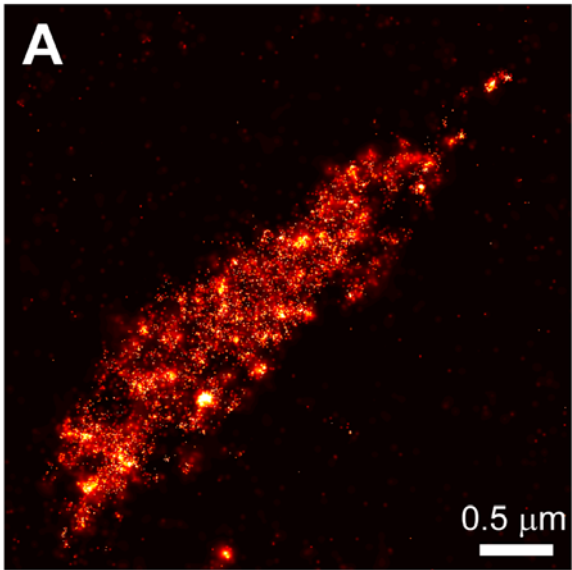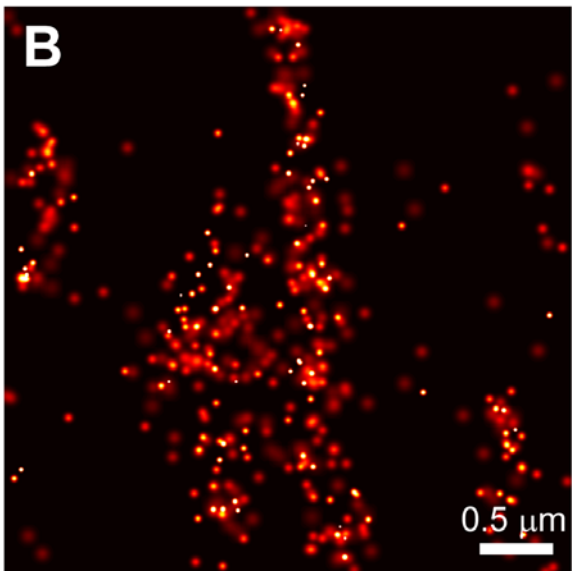

Supplement: supp_0710517105_10517Fig6.pdf [file supp_0710517105_10517Fig6.pdf]

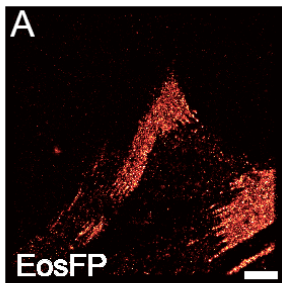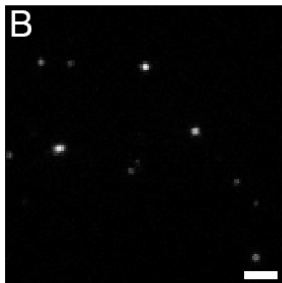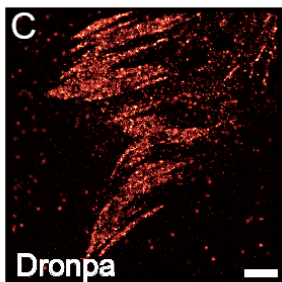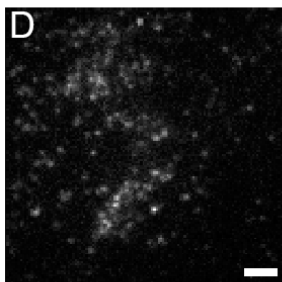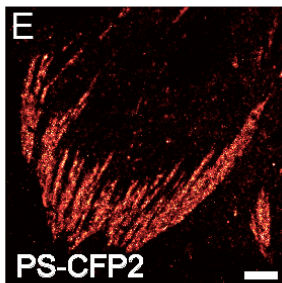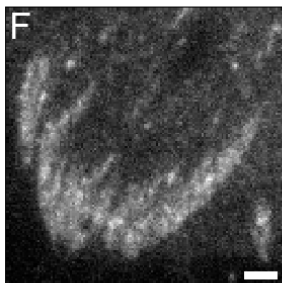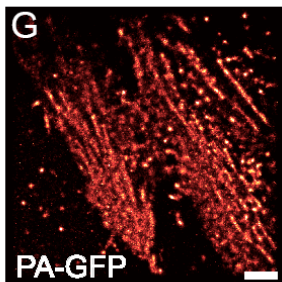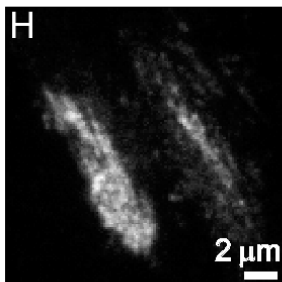

Supplement: supp_0710517105_10517Fig7.pdf [file supp_0710517105_10517Fig7.pdf]

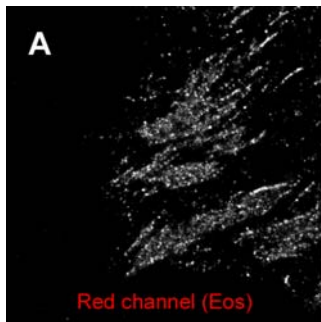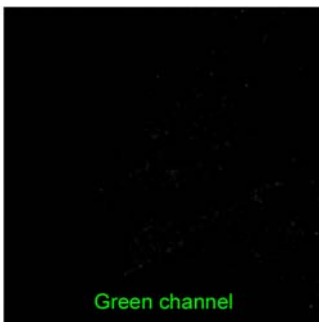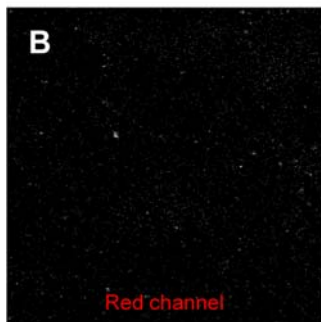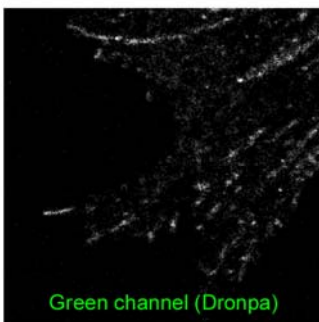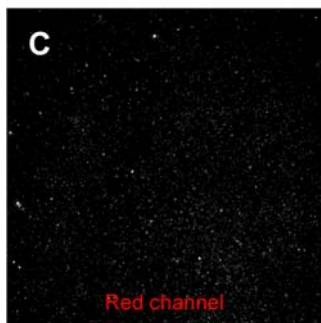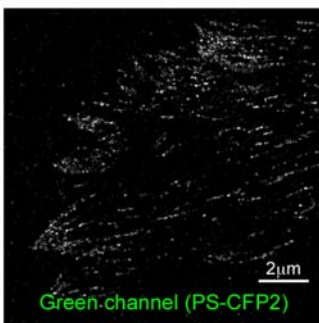

Supplement: supp_0710517105_10517Fig8.pdf [file supp_0710517105_10517Fig8.pdf]

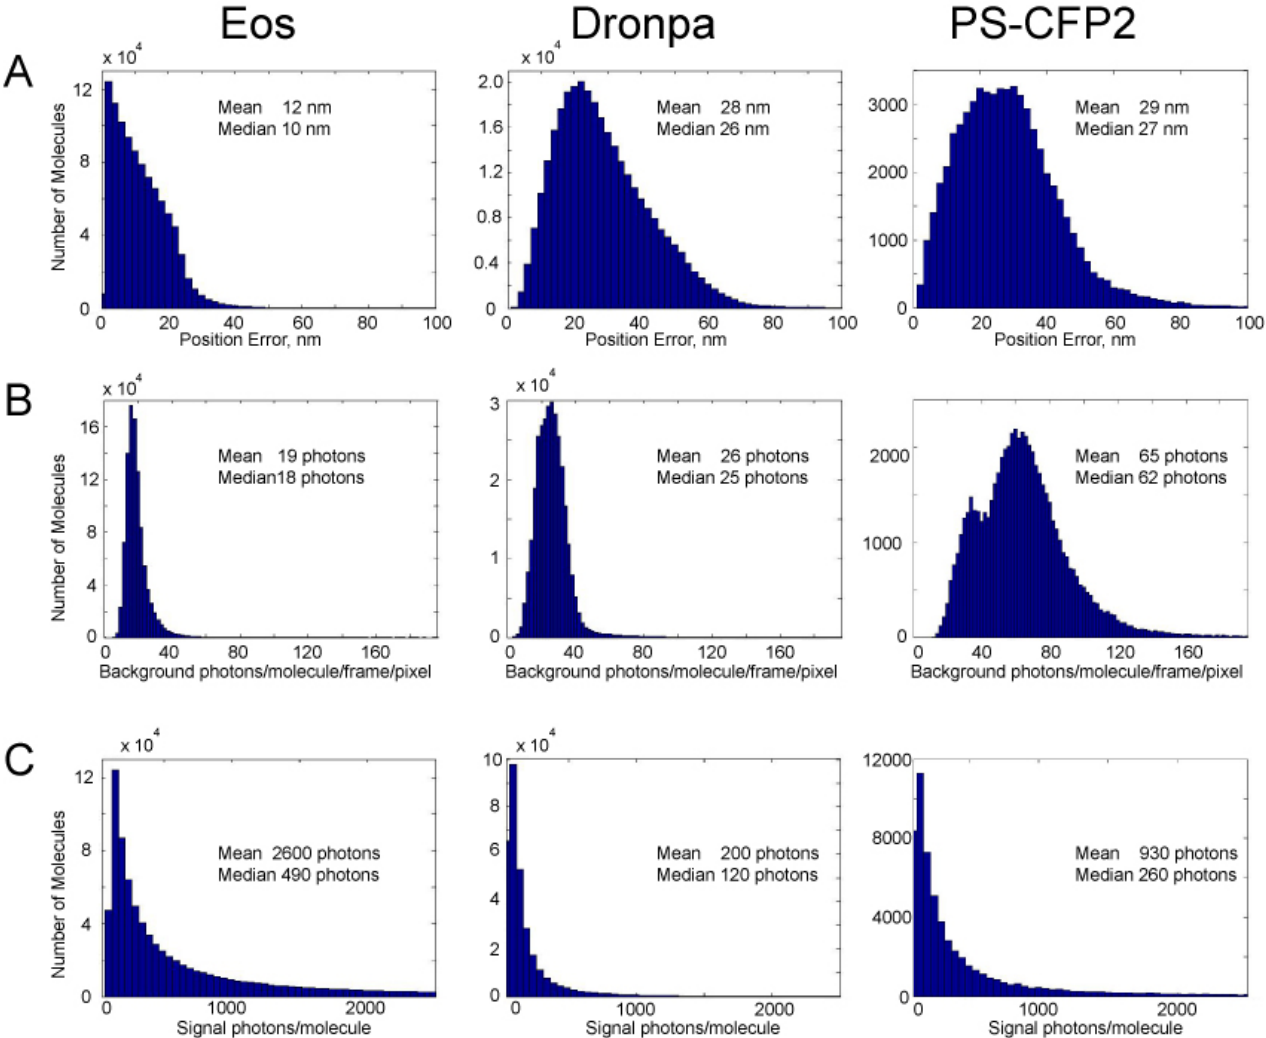

Supplement: supp_0710517105_10517Fig9.pdf [file supp_0710517105_10517Fig9.pdf]
